# Supplementary material for: Genome-Wide Population Structure and Selection Signatures of Yunling Goat Based on RAD-seq
Source: MDPI journal article supplement (doi:10.3390/ani12182401), 2022-09-13
Supplement: s1 [file s1]

# Supplementary Files

**Table S1.** Statistical table of sequencing quality.

| Sample ID | Number of Bases in Raw Data (bp) | Number of High-Quality Reads | High Quality Total Number of Bases (bp) | Clean GC (%) | Clean Q30(%) |
|-----------|----------------------------------|------------------------------|-----------------------------------------|--------------|--------------|
| YR192     | 5,628,596,183                    | 18,961,533                   | 5,628,597,706                           | 45.05        | 93.53        |
| YR218     | 5,519,121,282                    | 18,654,356                   | 5,519,122,294                           | 44.25        | 93.5         |
| YR195     | 5,560,966,735                    | 18,860,667                   | 5,560,967,882                           | 44.82        | 93.75        |
| YR196     | 5,808,310,757                    | 19,699,840                   | 5,808,311,991                           | 44.46        | 93.59        |
| NBY122    | 6,360,894,381                    | 21,647,195                   | 6,360,895,994                           | 44.2         | 93.08        |
| YR199     | 5,464,092,951                    | 18,531,712                   | 5,464,093,794                           | 44.48        | 93.48        |
| NBY120    | 4,403,955,259                    | 14,987,258                   | 4,403,956,030                           | 43.87        | 92.79        |
| YR217     | 5,080,103,413                    | 17,170,355                   | 5,080,104,381                           | 44.23        | 93.42        |
| YR215     | 5,273,919,860                    | 17,826,424                   | 5,273,922,069                           | 44.77        | 93.5         |
| YR214     | 5,474,823,403                    | 18,504,655                   | 5,474,824,837                           | 44.28        | 93.42        |
| YR204     | 6,084,661,216                    | 20,707,555                   | 6,084,662,740                           | 44.54        | 93.78        |
| YR205     | 5,145,131,346                    | 17,509,144                   | 5,145,132,265                           | 44.7         | 93.51        |
| YR201     | 5,845,698,197                    | 19,894,098                   | 5,845,700,097                           | 44.38        | 93.62        |
| YR203     | 5,963,269,017                    | 20,294,702                   | 5,963,269,978                           | 44.64        | 93.48        |
| YR208     | 4,500,854,653                    | 15,318,079                   | 4,500,855,399                           | 44.87        | 93.1         |
| YR209     | 4,895,881,174                    | 16,660,272                   | 4,895,881,844                           | 44.56        | 93.44        |
| NBY56     | 4,351,834,739                    | 14,609,742                   | 4,351,835,720                           | 43.61        | 93.5         |
| NBY55     | 5,417,061,925                    | 18,185,514                   | 5,417,063,388                           | 43.76        | 93.59        |
| NBY53     | 5,185,489,298                    | 17,525,938                   | 5,185,490,909                           | 43.7         | 93.66        |
| NBY52     | 4,810,390,077                    | 16,258,168                   | 4,810,391,046                           | 43.79        | 93.66        |
| YR164     | 5,345,557,096                    | 18,192,014                   | 5,345,558,025                           | 44.64        | 93.2         |
| YR166     | 7,110,645,970                    | 24,198,128                   | 7,110,647,778                           | 44.54        | 93.5         |
| NBY59     | 6,230,630,060                    | 20,986,849                   | 6,230,631,253                           | 43.65        | 93.83        |
| NBY58     | 4,665,598,374                    | 15,715,347                   | 4,665,599,190                           | 44.06        | 93.61        |
| NBY35     | 5,949,231,363                    | 20,245,441                   | 5,949,232,649                           | 44.3         | 93.06        |
| NBY36     | 5,704,554,788                    | 19,412,530                   | 5,704,555,692                           | 44.11        | 93.52        |
| YR75      | 5,698,853,960                    | 19,393,560                   | 5,698,854,858                           | 43.98        | 93.45        |
| YR76      | 5,246,247,665                    | 17,852,983                   | 5,246,248,382                           | 44.22        | 93.53        |
| NBY32     | 6,721,582,482                    | 22,873,519                   | 6,721,583,821                           | 44.27        | 93.58        |
| YR79      | 5,730,835,013                    | 19,370,629                   | 5,730,836,806                           | 44.12        | 93.28        |
| NBY38     | 6,020,137,131                    | 20,486,955                   | 6,020,138,449                           | 44           | 93.57        |
| NBY23     | 5,959,960,140                    | 20,282,108                   | 5,959,961,993                           | 43.95        | 93.53        |
| NBY105    | 5,881,878,263                    | 19,747,351                   | 5,881,880,173                           | 43.91        | 92.88        |
| NBY107    | 5,573,445,328                    | 18,712,476                   | 5,573,446,851                           | 43.66        | 92.77        |
| NBY100    | 5,339,046,194                    | 18,046,716                   | 5,339,047,375                           | 43.61        | 92.93        |
| NBY101    | 4,639,218,162                    | 15,680,771                   | 4,639,218,925                           | 43.75        | 92.96        |
| NBY103    | 5,391,703,631                    | 18,224,165                   | 5,391,705,205                           | 43.65        | 92.97        |
| NBY109    | 5,522,309,231                    | 18,602,570                   | 5,522,310,216                           | 43.76        | 92.93        |
| NBY40     | 5,954,972,798                    | 20,263,417                   | 5,954,973,469                           | 43.89        | 93.84        |
| NBY42     | 6,249,514,703                    | 21,122,105                   | 6,249,516,304                           | 43.73        | 93.6         |
| NBY44     | 5,758,921,575                    | 19,463,931                   | 5,758,923,706                           | 43.58        | 93.7         |
| YR178     | 7,171,270,727                    | 24,405,296                   | 7,171,271,732                           | 45.09        | 93.78        |
| YR229     | 5,113,855,170                    | 17,225,722                   | 5,113,856,214                           | 44.55        | 93.64        |
| NBY48     | 5,856,488,600                    | 19,793,818                   | 5,856,489,741                           | 43.61        | 93.6         |
| YR174     | 6,527,795,444                    | 22,216,495                   | 6,527,797,253                           | 45.22        | 93.6         |
| YR172     | 7,389,489,608                    | 25,147,681                   | 7,389,490,706                           | 44.98        | 93.21        |
| YR173     | 5,529,061,555                    | 18,816,414                   | 5,529,062,403                           | 44.93        | 93.56        |
| YR168     | 6,326,484,649                    | 21,533,358                   | 6,326,486,361                           | 45.63        | 93.43        |
| NBY27     | 5,259,553,382                    | 17,898,462                   | 5,259,554,462                           | 44.45        | 93.34        |
| NBY22     | 6,091,587,719                    | 20,659,853                   | 6,091,589,009                           | 44.3         | 93.41        |

|        |               |            |               |       |       |
|--------|---------------|------------|---------------|-------|-------|
| YR66   | 4,360,920,293 | 14,840,653 | 4,360,921,151 | 44.42 | 93.31 |
| NBY20  | 5,675,840,966 | 19,249,452 | 5,675,842,399 | 43.96 | 92.99 |
| NBY29  | 5,656,174,628 | 19,248,199 | 5,656,176,114 | 43.95 | 93.66 |
| NBY112 | 5,353,417,512 | 18,156,638 | 5,353,418,547 | 43.89 | 93.13 |
| NBY110 | 5,189,127,768 | 17,480,349 | 5,189,128,926 | 43.7  | 93.17 |
| NBY117 | 5,296,954,828 | 17,964,830 | 5,296,955,572 | 43.89 | 92.84 |
| NBY115 | 4,839,455,873 | 16,413,520 | 4,839,457,191 | 44.22 | 92.33 |
| NBY114 | 5,991,423,411 | 20,321,081 | 5,991,424,826 | 44.05 | 92.87 |
| NBY118 | 5,444,961,632 | 18,530,435 | 5,444,963,645 | 44.02 | 92.91 |
| YR148  | 5,419,017,632 | 18,378,691 | 5,419,018,939 | 44.43 | 93.47 |
| YR143  | 5,139,168,845 | 17,312,130 | 5,139,170,144 | 44.23 | 93.32 |
| YR142  | 5,826,118,827 | 19,560,350 | 5,826,120,232 | 44.47 | 93.21 |
| YR140  | 6,667,180,969 | 22,385,259 | 6,667,184,031 | 44.7  | 93.29 |
| YR147  | 5,066,631,211 | 17,067,563 | 5,066,632,408 | 44.25 | 93.54 |
| NBY13  | 7,633,683,250 | 25,628,825 | 7,633,685,834 | 44.27 | 93.34 |
| NBY11  | 6,908,873,021 | 23,194,816 | 6,908,875,371 | 44.11 | 93.48 |
| NBY10  | 6,034,551,365 | 20,396,787 | 6,034,553,584 | 44.08 | 93.51 |
| NBY17  | 6,004,590,859 | 20,363,785 | 6,004,592,090 | 43.9  | 93.68 |
| NBY16  | 6,075,167,488 | 20,464,811 | 6,075,169,268 | 44.03 | 93.69 |
| NBY14  | 5,753,151,347 | 19,380,005 | 5,753,152,973 | 44.14 | 93.47 |
| NBY19  | 6,021,112,883 | 20,420,362 | 6,021,114,399 | 43.98 | 93.45 |
| YR155  | 6,560,411,045 | 22,250,019 | 6,560,412,664 | 44.83 | 92.8  |
| YR157  | 7,987,212,505 | 27,089,577 | 7,987,214,134 | 44.8  | 93.22 |
| YR152  | 8,467,372,755 | 28,718,050 | 8,467,375,088 | 44.84 | 93.27 |
| YR158  | 6,471,771,054 | 22,024,942 | 6,471,773,571 | 44.34 | 93.36 |
| YR193  | 6,227,752,180 | 20,979,507 | 6,227,753,777 | 44.55 | 93.81 |
| NBY08  | 6,406,384,794 | 21,653,878 | 6,406,386,739 | 44.02 | 93.5  |
| NBY05  | 5,799,126,933 | 19,601,064 | 5,799,129,533 | 44.34 | 93.53 |
| NBY07  | 5,703,041,362 | 19,275,775 | 5,703,042,987 | 43.7  | 93.45 |
| NBY01  | 5,944,245,652 | 20,091,666 | 5,944,247,458 | 43.92 | 93.48 |
| YR198  | 5,560,718,298 | 18,860,739 | 5,560,720,114 | 45.2  | 93    |
| YR212  | 4,794,971,751 | 16,317,938 | 4,794,972,595 | 44.98 | 93.56 |
| NBY125 | 6,107,065,464 | 20,783,364 | 6,107,066,610 | 44.36 | 92.53 |
| YR211  | 4,935,583,045 | 16,795,610 | 4,935,583,720 | 44.27 | 93.53 |
| YR123  | 4,980,535,173 | 16,834,544 | 4,980,537,075 | 43.94 | 93.44 |
| YR242  | 5,181,915,765 | 17,633,641 | 5,181,917,208 | 43.87 | 93.47 |
| YR245  | 4,784,130,298 | 16,280,379 | 4,784,130,950 | 44.09 | 93.32 |
| NBY124 | 6,020,123,248 | 20,486,976 | 6,020,124,228 | 43.86 | 92.98 |
| NBY92  | 6,485,573,543 | 22,070,239 | 6,485,574,408 | 43.73 | 93.03 |
| NBY90  | 6,303,352,897 | 21,449,174 | 6,303,353,579 | 43.77 | 93.66 |
| NBY97  | 5,066,441,948 | 17,125,033 | 5,066,444,028 | 43.88 | 92.98 |
| NBY95  | 5,451,208,697 | 18,424,993 | 5,451,209,873 | 43.64 | 92.92 |
| NBY94  | 5,679,716,862 | 19,328,523 | 5,679,717,606 | 44.19 | 93.13 |
| NBY71  | 5,314,216,603 | 18,021,991 | 5,314,217,260 | 44.13 | 93.53 |
| NBY73  | 6,239,562,228 | 21,232,778 | 6,239,564,148 | 44.1  | 93.65 |
| YR132  | 4,997,413,308 | 16,891,633 | 4,997,414,579 | 44.32 | 93.36 |
| NBY85  | 4,680,809,922 | 15,927,728 | 4,680,810,955 | 43.39 | 93.81 |
| YR131  | 4,791,167,056 | 16,193,870 | 4,791,168,202 | 44.04 | 93.31 |
| NBY83  | 5,521,422,090 | 18,788,631 | 5,521,422,759 | 43.8  | 93.53 |
| NBY88  | 5,900,778,562 | 20,079,111 | 5,900,779,347 | 43.95 | 93.24 |
| YR238  | 3,889,399,248 | 13,396,828 | 3,889,404,893 | 45.02 | 92.45 |
| YR235  | 5,390,566,604 | 18,281,967 | 5,390,567,801 | 44.09 | 93.41 |
| YR237  | 5,006,414,804 | 16,978,862 | 5,006,415,996 | 44.2  | 92.91 |
| YR230  | 4,872,425,784 | 16,524,650 | 4,872,426,966 | 44.55 | 93.54 |
| NBY69  | 3,968,621,857 | 13,459,354 | 3,968,622,951 | 44.46 | 93.03 |
| NBY63  | 5,194,643,840 | 17,616,323 | 5,194,644,927 | 43.81 | 93.58 |
| NBY61  | 5,448,532,340 | 18,477,045 | 5,448,533,133 | 44.14 | 93.78 |

|       |                |            |                |       |       |
|-------|----------------|------------|----------------|-------|-------|
| NBY87 | 5,329,746,412  | 18,135,782 | 5,329,747,048  | 43.66 | 93.77 |
| YR135 | 5,177,236,479  | 17,499,483 | 5,177,238,275  | 44.36 | 93.35 |
| YR187 | 6,164,319,745  | 20,695,333 | 6,164,321,783  | 44.83 | 93.53 |
| YR186 | 8,275,603,627  | 27,973,373 | 8,275,607,120  | 44.75 | 93.58 |
| YR184 | 5,449,779,587  | 18,421,074 | 5,449,780,599  | 44.77 | 93.66 |
| YR183 | 5,685,848,367  | 19,218,112 | 5,685,849,585  | 44.77 | 93.55 |
| YR181 | 6,292,972,714  | 21,270,141 | 6,292,974,722  | 44.63 | 93.69 |
| YR180 | 6,212,572,632  | 20,999,275 | 6,212,575,010  | 44.95 | 93.53 |
| YR226 | 5,595,478,742  | 18,785,882 | 5,595,480,250  | 44.95 | 93.25 |
| YR227 | 4,335,287,955  | 14,603,785 | 4,335,289,130  | 44.36 | 93.35 |
| YR224 | 5,596,863,762  | 18,789,675 | 5,596,865,556  | 43.98 | 93.38 |
| YR223 | 11,204,659,589 | 37,869,688 | 11,204,663,011 | 44.03 | 93.47 |
| YR189 | 6,010,752,618  | 20,180,200 | 6,010,754,100  | 44.67 | 93.47 |

Notes:

Sample ID: Sample number.

YR: Yunling Goat.

NBY: Nubian Goat.

**Table S2.** Statistical table of the results of genome Alignment.

| Sample ID | Mapped Ratio(%) | Proper Ratio(%) | Average Insert Size | Average Depth | Genome Coverage(1X)(%) | Genome Coverage(5X)(%) |
|-----------|-----------------|-----------------|---------------------|---------------|------------------------|------------------------|
| YR192     | 99.92           | 95.22           | 382.4               | 1.92          | 21.53                  | 13.16                  |
| YR218     | 99.93           | 95.08           | 381.8               | 1.89          | 22.03                  | 13.35                  |
| YR195     | 99.93           | 95.33           | 380.4               | 1.9           | 21.48                  | 13.15                  |
| YR196     | 99.93           | 95.22           | 380                 | 1.99          | 21.94                  | 13.63                  |
| NBY122    | 99.93           | 95.29           | 374.4               | 2.17          | 22.6                   | 14.31                  |
| YR199     | 99.93           | 94.84           | 381.1               | 1.87          | 21.32                  | 13                     |
| YR211     | 99.93           | 95.1            | 380.7               | 1.69          | 21.17                  | 12.25                  |
| NBY90     | 99.93           | 95.69           | 375                 | 2.16          | 21.83                  | 14.24                  |
| YR217     | 99.91           | 95.09           | 382.4               | 1.74          | 21.28                  | 12.45                  |
| YR215     | 99.93           | 94.93           | 381.5               | 1.8           | 21.59                  | 12.71                  |
| YR214     | 99.93           | 94.98           | 382.4               | 1.87          | 21.88                  | 13.16                  |
| YR204     | 99.93           | 94.78           | 379.2               | 2.08          | 22.16                  | 13.99                  |
| YR205     | 99.92           | 94.83           | 380.6               | 1.76          | 21.34                  | 12.43                  |
| YR201     | 99.93           | 94.98           | 379.3               | 2             | 21.83                  | 13.62                  |
| YR203     | 99.93           | 94.62           | 379.5               | 2.04          | 22.03                  | 13.79                  |
| YR208     | 99.94           | 95.23           | 378.3               | 1.54          | 20.92                  | 11.5                   |
| YR209     | 99.93           | 95.1            | 380.8               | 1.67          | 20.98                  | 12.03                  |
| NBY56     | 99.92           | 95.14           | 379.2               | 1.49          | 19.13                  | 10.93                  |
| NBY55     | 99.91           | 95.15           | 379.2               | 1.85          | 20.72                  | 12.75                  |
| NBY53     | 99.9            | 95.13           | 377.1               | 1.77          | 20.3                   | 12.34                  |
| YR168     | 99.93           | 95.38           | 376.9               | 2.16          | 22.57                  | 14.15                  |
| YR164     | 99.93           | 95.48           | 380.1               | 1.83          | 21.19                  | 12.73                  |
| YR166     | 99.92           | 95.67           | 380.3               | 2.43          | 23.04                  | 15.24                  |
| NBY59     | 99.91           | 95.26           | 378.4               | 2.13          | 21.54                  | 13.94                  |
| NBY58     | 99.93           | 95.15           | 378.4               | 1.6           | 19.64                  | 11.47                  |
| NBY35     | 99.92           | 95.46           | 369.3               | 2.03          | 20.87                  | 13.4                   |
| NBY36     | 99.92           | 95.52           | 369.2               | 1.95          | 20.37                  | 12.93                  |
| YR75      | 99.93           | 95.23           | 380.9               | 1.95          | 21.68                  | 13.36                  |
| YR76      | 99.93           | 95.4            | 381                 | 1.79          | 21.22                  | 12.7                   |
| NBY32     | 99.91           | 95.28           | 369.5               | 2.3           | 21.34                  | 14.14                  |
| YR79      | 99.92           | 94.83           | 382.6               | 1.96          | 21.7                   | 13.4                   |
| NBY38     | 99.91           | 95.45           | 369.6               | 2.06          | 20.55                  | 13.24                  |
| YR66      | 99.93           | 95.06           | 381.3               | 1.49          | 19.42                  | 10.78                  |
| NBY105    | 99.92           | 95.45           | 379.1               | 2.01          | 22.27                  | 13.77                  |
| NBY107    | 99.92           | 95.43           | 379.4               | 1.91          | 21.72                  | 13.17                  |
| NBY100    | 99.9            | 95.54           | 376.2               | 1.82          | 21.88                  | 13.25                  |
| NBY101    | 99.92           | 95.52           | 377.4               | 1.59          | 20.59                  | 11.7                   |
| NBY103    | 99.91           | 95.4            | 377                 | 1.84          | 21.74                  | 13.16                  |
| NBY109    | 99.92           | 95.42           | 378                 | 1.89          | 21.86                  | 13.24                  |
| NBY40     | 99.91           | 95.41           | 375.1               | 2.04          | 21.48                  | 13.73                  |
| NBY42     | 99.92           | 95.69           | 377.6               | 2.14          | 21.24                  | 13.65                  |
| NBY44     | 99.92           | 95.69           | 377.3               | 1.97          | 20.89                  | 13.18                  |
| YR178     | 99.93           | 95.38           | 379.3               | 2.45          | 23.19                  | 15.38                  |
| YR229     | 99.93           | 94.68           | 383.9               | 1.75          | 21.23                  | 12.39                  |
| NBY48     | 99.91           | 95.81           | 377.2               | 2             | 21.1                   | 13.39                  |
| YR174     | 99.92           | 95.16           | 379.4               | 2.23          | 22.32                  | 14.29                  |
| YR172     | 99.93           | 95.07           | 379.6               | 2.53          | 23.43                  | 15.69                  |
| YR173     | 99.92           | 94.99           | 379.7               | 1.89          | 21.31                  | 12.96                  |
| NBY52     | 99.92           | 95.29           | 377.5               | 1.64          | 19.62                  | 11.56                  |
| NBY27     | 99.92           | 95.11           | 369.5               | 1.8           | 19.67                  | 12.12                  |
| NBY22     | 99.92           | 95.18           | 369.8               | 2.08          | 20.88                  | 13.5                   |
| NBY23     | 99.91           | 95.3            | 369                 | 2.04          | 20.79                  | 13.41                  |
| NBY20     | 99.92           | 95.5            | 370.6               | 1.94          | 20.27                  | 12.77                  |

|        |       |       |       |      |       |       |
|--------|-------|-------|-------|------|-------|-------|
| NBY29  | 99.92 | 95.39 | 369.3 | 1.93 | 20.2  | 12.81 |
| NBY112 | 99.93 | 95.35 | 374.9 | 1.83 | 21.89 | 13.2  |
| NBY110 | 99.93 | 95.31 | 377.8 | 1.77 | 21.48 | 12.78 |
| NBY117 | 99.93 | 95.45 | 375.7 | 1.81 | 21.63 | 12.99 |
| NBY115 | 99.93 | 95.31 | 375.9 | 1.65 | 20.95 | 12.01 |
| NBY114 | 99.92 | 95.33 | 375   | 2.05 | 22.62 | 14.17 |
| NBY118 | 99.92 | 95.34 | 374.5 | 1.86 | 21.65 | 13.03 |
| YR148  | 99.92 | 95.04 | 381.9 | 1.85 | 21.11 | 12.71 |
| YR143  | 99.92 | 95.03 | 383.8 | 1.76 | 20.76 | 12.24 |
| YR142  | 99.92 | 95.1  | 384.5 | 1.99 | 21.82 | 13.46 |
| YR140  | 99.92 | 95.47 | 383.2 | 2.28 | 22.74 | 14.63 |
| YR147  | 99.93 | 95.16 | 383.9 | 1.73 | 20.7  | 12.21 |
| NBY13  | 99.91 | 95.52 | 373.3 | 2.61 | 22.2  | 15.27 |
| NBY11  | 99.92 | 95.32 | 373.2 | 2.36 | 21.59 | 14.43 |
| NBY10  | 99.92 | 95.36 | 371.2 | 2.06 | 20.63 | 13.3  |
| NBY17  | 99.91 | 95.37 | 370.5 | 2.05 | 20.59 | 13.24 |
| NBY16  | 99.91 | 95.56 | 372.4 | 2.08 | 20.63 | 13.34 |
| NBY14  | 99.9  | 95.07 | 372.5 | 1.97 | 20.31 | 12.89 |
| NBY19  | 99.91 | 95.13 | 370.6 | 2.06 | 20.67 | 13.25 |
| YR155  | 99.93 | 95.38 | 381.2 | 2.24 | 22.51 | 14.39 |
| YR157  | 99.93 | 95.82 | 381.1 | 2.73 | 23.81 | 16.27 |
| YR152  | 99.93 | 95.52 | 381.2 | 2.89 | 24.08 | 16.61 |
| YR158  | 99.92 | 95.33 | 379.6 | 2.21 | 22.56 | 14.52 |
| YR193  | 99.93 | 95.23 | 382.2 | 2.13 | 22.29 | 14.23 |
| NBY08  | 99.92 | 95.67 | 371.5 | 2.19 | 20.9  | 13.72 |
| NBY05  | 99.91 | 95.46 | 371.4 | 1.98 | 20.32 | 12.88 |
| NBY07  | 99.91 | 95.27 | 371.9 | 1.95 | 20.08 | 12.72 |
| NBY01  | 99.91 | 95.36 | 371   | 2.03 | 20.69 | 13.3  |
| YR198  | 99.93 | 94.99 | 380.2 | 1.9  | 21.61 | 13.06 |
| YR212  | 99.93 | 94.87 | 380.2 | 1.64 | 21    | 11.89 |
| NBY120 | 99.92 | 95.1  | 375.3 | 1.51 | 20.09 | 11.12 |
| YR123  | 99.92 | 95.21 | 382.3 | 1.7  | 20.74 | 12.19 |
| YR242  | 99.92 | 94.97 | 381.2 | 1.77 | 21.31 | 12.64 |
| YR245  | 99.93 | 94.74 | 380.7 | 1.64 | 20.87 | 11.97 |
| NBY124 | 99.92 | 95.54 | 375.8 | 2.06 | 22    | 13.61 |
| NBY92  | 99.93 | 95.63 | 375.7 | 2.22 | 22.78 | 14.64 |
| NBY125 | 99.93 | 95.37 | 375.4 | 2.09 | 22.41 | 13.93 |
| NBY97  | 99.91 | 95.4  | 376.9 | 1.73 | 21.27 | 12.51 |
| NBY95  | 99.92 | 95.64 | 377.3 | 1.86 | 21.79 | 13.25 |
| NBY94  | 99.93 | 95.76 | 375.1 | 1.94 | 22.22 | 13.69 |
| NBY71  | 99.93 | 95.35 | 376   | 1.82 | 20.53 | 12.6  |
| NBY73  | 99.92 | 95.45 | 374.7 | 2.13 | 21.66 | 13.97 |
| YR132  | 99.92 | 95.3  | 382.5 | 1.71 | 20.67 | 12.14 |
| NBY85  | 99.92 | 95.42 | 375.9 | 1.6  | 19.32 | 11.35 |
| YR131  | 99.91 | 95.1  | 383.4 | 1.64 | 20.23 | 11.71 |
| NBY83  | 99.93 | 95.72 | 375.4 | 1.89 | 20.76 | 12.91 |
| NBY88  | 99.93 | 95.58 | 375.9 | 2.02 | 21.31 | 13.54 |
| YR238  | 99.91 | 95.98 | 357.9 | 1.33 | 22.7  | 10.71 |
| YR235  | 99.93 | 95.15 | 381.2 | 1.84 | 21.92 | 13.18 |
| YR237  | 99.93 | 95.18 | 381.7 | 1.71 | 21.43 | 12.49 |
| YR230  | 99.93 | 94.59 | 381.7 | 1.67 | 20.85 | 11.96 |
| NBY69  | 99.92 | 95.35 | 375.9 | 1.36 | 18.56 | 10.14 |
| NBY63  | 99.92 | 95.3  | 376.4 | 1.78 | 20.35 | 12.32 |
| NBY61  | 99.92 | 95.24 | 375.9 | 1.86 | 20.83 | 12.9  |
| NBY87  | 99.92 | 95.42 | 375.9 | 1.82 | 20.41 | 12.52 |
| YR135  | 99.92 | 95.21 | 382.4 | 1.77 | 20.92 | 12.45 |
| YR187  | 99.93 | 94.99 | 384.1 | 2.11 | 22.06 | 13.88 |

|       |       |       |       |      |       |       |
|-------|-------|-------|-------|------|-------|-------|
| YR186 | 99.93 | 94.67 | 381.3 | 2.83 | 23.77 | 16.54 |
| YR184 | 99.93 | 95.49 | 381.1 | 1.86 | 21.48 | 13.09 |
| YR183 | 99.9  | 95.08 | 382   | 1.94 | 21.48 | 13.19 |
| YR181 | 99.92 | 95.12 | 381.7 | 2.15 | 22.3  | 14.25 |
| YR180 | 99.92 | 95.02 | 381.4 | 2.12 | 22.21 | 14.05 |
| YR226 | 99.93 | 94.37 | 384.4 | 1.91 | 21.82 | 13    |
| YR227 | 99.93 | 94.51 | 384.6 | 1.48 | 19.87 | 10.88 |
| YR224 | 99.92 | 94.65 | 385.5 | 1.91 | 21.76 | 13.15 |
| YR223 | 99.93 | 96.24 | 383.6 | 3.83 | 25.58 | 19.08 |
| YR189 | 99.92 | 95.49 | 384   | 2.05 | 21.87 | 13.77 |

Notes:

Sample ID: Sample number.

YR: Yunling Goat.

NBY: Nubian Goat.

Mapped Ratio: Percentage of the number of Clean Reads in the genome aligned to all Clean Reads.

Proper Ratio: The percentage of Clean Reads that were aligned to the reference genome and were in line with the length of the sequencing fragment by double-ended sequencing sequences.

Average Insert Size: Sequencing library size is the inserted fragment size after comparing the sequencing double-ended data with the genome.

Average Depth: Average sequencing depth is the ratio between the total number of bases in the previous genome and the total length of the reference genome.

Genome Coverage(1X)(%): Percentage of total genome length covered by at least one Reads.

Genome Coverage(5X)(%): The percentage of the total length of the genome covered by at least five Reads.

Table S3. Statistical table of SNP.

| Sample ID | SNP Number | Transition | Transversion | Ti/Tv | Heterozygosity<br>Number | Homozygosity<br>Number |
|-----------|------------|------------|--------------|-------|--------------------------|------------------------|
| NBY01     | 1,813,943  | 1,213,781  | 598,499      | 2.03  | 838,321                  | 975,622                |
| NBY05     | 1,741,997  | 1,165,426  | 575,088      | 2.03  | 785,496                  | 956,501                |
| NBY07     | 1,732,393  | 1,161,156  | 569,802      | 2.04  | 801,487                  | 930,906                |
| NBY08     | 1,817,898  | 1,216,452  | 599,829      | 2.03  | 843,201                  | 974,697                |
| NBY10     | 1,788,527  | 1,199,989  | 586,975      | 2.04  | 833,231                  | 955,296                |
| NBY100    | 1,924,026  | 1,290,415  | 631,855      | 2.04  | 960,406                  | 963,620                |
| NBY101    | 1,771,619  | 1,188,873  | 581,164      | 2.05  | 825,725                  | 945,894                |
| NBY103    | 1,910,355  | 1,281,013  | 627,611      | 2.04  | 925,963                  | 984,392                |
| NBY105    | 1,965,732  | 1,315,735  | 648,163      | 2.03  | 946,324                  | 1,019,408              |
| NBY107    | 1,900,764  | 1,275,082  | 624,013      | 2.04  | 913,055                  | 987,709                |
| NBY109    | 1,932,334  | 1,291,365  | 639,235      | 2.02  | 915,211                  | 1,017,123              |
| NBY11     | 1,794,780  | 1,194,050  | 599,242      | 1.99  | 671,136                  | 1,123,644              |
| NBY110    | 1,874,916  | 1,257,811  | 615,531      | 2.04  | 887,449                  | 987,467                |
| NBY112    | 1,921,582  | 1,283,653  | 636,189      | 2.02  | 899,946                  | 1,021,636              |
| NBY114    | 1,996,636  | 1,334,721  | 660,071      | 2.02  | 921,763                  | 1,074,873              |
| NBY115    | 1,754,930  | 1,174,708  | 578,801      | 2.03  | 717,524                  | 1,037,406              |
| NBY117    | 1,903,610  | 1,276,112  | 625,747      | 2.04  | 906,505                  | 997,105                |
| NBY118    | 1,908,766  | 1,277,193  | 629,808      | 2.03  | 907,449                  | 1,001,317              |
| NBY120    | 1,739,047  | 1,164,658  | 572,916      | 2.03  | 803,686                  | 935,361                |
| NBY122    | 2,022,500  | 1,345,137  | 675,452      | 1.99  | 936,124                  | 1,086,376              |
| NBY124    | 1,963,924  | 1,314,035  | 648,108      | 2.03  | 953,482                  | 1,010,442              |
| NBY125    | 2,013,776  | 1,345,417  | 666,502      | 2.02  | 980,053                  | 1,033,723              |
| NBY13     | 1,982,714  | 1,326,775  | 654,096      | 2.03  | 967,878                  | 1,014,836              |
| NBY14     | 1,759,231  | 1,178,098  | 579,564      | 2.03  | 815,812                  | 943,419                |
| NBY16     | 1,794,368  | 1,203,891  | 588,885      | 2.04  | 844,622                  | 949,746                |
| NBY17     | 1,812,407  | 1,212,639  | 598,099      | 2.03  | 848,118                  | 964,289                |
| NBY19     | 1,799,738  | 1,204,637  | 593,527      | 2.03  | 847,906                  | 951,832                |
| NBY20     | 1,752,614  | 1,175,680  | 575,405      | 2.04  | 828,177                  | 924,437                |
| NBY22     | 1,819,338  | 1,212,578  | 605,187      | 2     | 812,925                  | 1,006,413              |
| NBY23     | 1,816,052  | 1,216,179  | 598,271      | 2.03  | 842,039                  | 974,013                |
| NBY27     | 1,678,175  | 1,118,467  | 558,157      | 2     | 736,699                  | 941,476                |
| NBY29     | 1,745,661  | 1,171,690  | 572,468      | 2.05  | 813,669                  | 931,992                |
| NBY32     | 1,879,076  | 1,252,447  | 624,922      | 2     | 877,341                  | 1,001,735              |
| NBY35     | 1,804,824  | 1,208,181  | 595,060      | 2.03  | 830,335                  | 974,489                |
| NBY36     | 1,775,488  | 1,188,324  | 585,532      | 2.03  | 830,440                  | 945,048                |
| NBY38     | 1,768,288  | 1,185,406  | 581,384      | 2.04  | 812,354                  | 955,934                |
| NBY40     | 1,871,133  | 1,251,549  | 617,871      | 2.03  | 871,074                  | 1,000,059              |
| NBY42     | 1,862,364  | 1,243,343  | 617,300      | 2.01  | 857,635                  | 1,004,729              |
| NBY44     | 1,794,625  | 1,202,897  | 590,199      | 2.04  | 820,122                  | 974,503                |
| NBY48     | 1,832,989  | 1,226,237  | 605,151      | 2.03  | 849,480                  | 983,509                |
| NBY52     | 1,679,592  | 1,124,315  | 553,830      | 2.03  | 742,888                  | 936,704                |
| NBY53     | 1,750,664  | 1,174,610  | 574,596      | 2.04  | 807,958                  | 942,706                |
| NBY55     | 1,803,596  | 1,205,241  | 596,766      | 2.02  | 835,577                  | 968,019                |
| NBY56     | 1,631,169  | 1,095,517  | 534,296      | 2.05  | 740,446                  | 890,723                |
| NBY58     | 1,662,274  | 1,111,672  | 549,195      | 2.02  | 732,225                  | 930,049                |
| NBY59     | 1,905,537  | 1,273,757  | 629,985      | 2.02  | 916,190                  | 989,347                |
| NBY61     | 1,820,964  | 1,211,331  | 607,931      | 1.99  | 824,700                  | 996,264                |
| NBY63     | 1,761,294  | 1,176,826  | 582,946      | 2.02  | 813,499                  | 947,795                |
| NBY69     | 1,560,655  | 1,045,477  | 513,837      | 2.03  | 689,749                  | 870,906                |
| NBY71     | 1,757,310  | 1,175,006  | 580,842      | 2.02  | 789,773                  | 967,537                |
| NBY73     | 1,907,023  | 1,272,887  | 632,371      | 2.01  | 912,704                  | 994,319                |
| NBY83     | 1,775,812  | 1,192,182  | 582,181      | 2.05  | 822,268                  | 953,544                |
| NBY85     | 1,648,297  | 1,105,906  | 540,998      | 2.04  | 731,778                  | 916,519                |

|       |           |           |         |      |           |           |
|-------|-----------|-----------|---------|------|-----------|-----------|
| NBY87 | 1,757,958 | 1,181,398 | 575,061 | 2.05 | 810,713   | 947,245   |
| NBY88 | 1,849,292 | 1,239,095 | 608,559 | 2.04 | 859,763   | 989,529   |
| NBY90 | 1,929,084 | 1,291,676 | 635,670 | 2.03 | 926,567   | 1,002,517 |
| NBY92 | 2,027,893 | 1,355,839 | 670,222 | 2.02 | 988,568   | 1,039,325 |
| NBY94 | 1,958,543 | 1,313,783 | 643,073 | 2.04 | 966,881   | 991,662   |
| NBY95 | 1,902,710 | 1,273,421 | 627,597 | 2.03 | 913,240   | 989,470   |
| NBY97 | 1,852,453 | 1,240,364 | 610,438 | 2.03 | 890,416   | 962,037   |
| YR123 | 1,794,362 | 1,200,189 | 592,652 | 2.03 | 780,015   | 1,014,347 |
| YR131 | 1,706,949 | 1,143,468 | 562,048 | 2.03 | 701,554   | 1,005,395 |
| YR132 | 1,732,048 | 1,154,705 | 575,925 | 2    | 670,252   | 1,061,796 |
| YR135 | 1,740,474 | 1,161,114 | 577,992 | 2.01 | 658,298   | 1,082,176 |
| YR140 | 2,002,017 | 1,333,907 | 666,334 | 2    | 910,636   | 1,091,381 |
| YR142 | 1,890,523 | 1,260,056 | 628,748 | 2    | 834,799   | 1,055,724 |
| YR143 | 1,714,480 | 1,139,804 | 573,302 | 1.99 | 599,688   | 1,114,792 |
| YR147 | 1,716,284 | 1,143,999 | 571,028 | 2    | 629,618   | 1,086,666 |
| YR148 | 1,788,635 | 1,190,745 | 596,387 | 2    | 688,614   | 1,100,021 |
| YR152 | 2,130,703 | 1,416,021 | 712,759 | 1.99 | 914,585   | 1,216,118 |
| YR155 | 1,928,071 | 1,284,972 | 641,497 | 2    | 792,662   | 1,135,409 |
| YR157 | 2,145,065 | 1,433,621 | 709,442 | 2.02 | 1,084,613 | 1,060,452 |
| YR158 | 1,968,391 | 1,317,598 | 649,175 | 2.03 | 880,325   | 1,088,066 |
| YR164 | 1,738,195 | 1,157,378 | 579,499 | 2    | 609,132   | 1,129,063 |
| YR166 | 2,064,851 | 1,376,138 | 686,755 | 2    | 976,916   | 1,087,935 |
| YR168 | 1,969,252 | 1,307,374 | 660,117 | 1.98 | 819,031   | 1,150,221 |
| YR172 | 2,059,631 | 1,368,028 | 689,719 | 1.98 | 881,447   | 1,178,184 |
| YR173 | 1,793,748 | 1,192,879 | 599,395 | 1.99 | 691,693   | 1,102,055 |
| YR174 | 1,916,449 | 1,274,556 | 640,221 | 1.99 | 787,217   | 1,129,232 |
| YR178 | 2,066,407 | 1,374,373 | 690,098 | 1.99 | 954,701   | 1,111,706 |
| YR180 | 1,923,720 | 1,279,645 | 642,287 | 1.99 | 832,923   | 1,090,797 |
| YR181 | 1,957,196 | 1,302,940 | 652,403 | 2    | 882,227   | 1,074,969 |
| YR183 | 1,852,783 | 1,232,997 | 618,177 | 1.99 | 771,622   | 1,081,161 |
| YR184 | 1,845,522 | 1,230,174 | 613,805 | 2    | 778,334   | 1,067,188 |
| YR186 | 1,952,926 | 1,292,992 | 658,473 | 1.96 | 629,885   | 1,323,041 |
| YR187 | 1,907,989 | 1,270,589 | 635,766 | 2    | 802,044   | 1,105,945 |
| YR189 | 1,815,628 | 1,212,446 | 601,752 | 2.01 | 668,388   | 1,147,240 |
| YR192 | 1,841,093 | 1,225,660 | 613,814 | 2    | 746,482   | 1,094,611 |
| YR193 | 1,909,129 | 1,270,531 | 636,997 | 1.99 | 762,875   | 1,146,254 |
| YR195 | 1,851,055 | 1,232,718 | 616,778 | 2    | 768,921   | 1,082,134 |
| YR196 | 1,897,396 | 1,265,202 | 630,569 | 2.01 | 806,469   | 1,090,927 |
| YR198 | 1,885,235 | 1,252,757 | 630,740 | 1.99 | 851,934   | 1,033,301 |
| YR199 | 1,785,959 | 1,189,425 | 595,129 | 2    | 690,739   | 1,095,220 |
| YR201 | 1,809,583 | 1,203,676 | 604,480 | 1.99 | 648,740   | 1,160,843 |
| YR203 | 1,891,162 | 1,255,809 | 633,705 | 1.98 | 770,193   | 1,120,969 |
| YR204 | 1,948,145 | 1,300,458 | 645,913 | 2.01 | 921,075   | 1,027,070 |
| YR205 | 1,793,382 | 1,199,189 | 592,741 | 2.02 | 731,447   | 1,061,935 |
| YR208 | 1,815,482 | 1,212,970 | 600,836 | 2.02 | 834,808   | 980,674   |
| YR209 | 1,781,271 | 1,183,723 | 596,051 | 1.99 | 730,241   | 1,051,030 |
| YR211 | 1,818,444 | 1,213,295 | 603,516 | 2.01 | 805,829   | 1,012,615 |
| YR212 | 1,799,271 | 1,198,941 | 598,748 | 2    | 771,813   | 1,027,458 |
| YR214 | 1,901,559 | 1,267,564 | 632,299 | 2    | 832,419   | 1,069,140 |
| YR215 | 1,848,226 | 1,233,907 | 612,688 | 2.01 | 808,487   | 1,039,739 |
| YR217 | 1,816,638 | 1,209,206 | 605,921 | 2    | 762,206   | 1,054,432 |
| YR218 | 1,921,265 | 1,284,862 | 634,650 | 2.02 | 872,072   | 1,049,193 |
| YR223 | 2,321,894 | 1,541,498 | 778,266 | 1.98 | 1,045,577 | 1,276,317 |
| YR224 | 1,846,435 | 1,229,870 | 615,013 | 2    | 736,085   | 1,110,350 |
| YR226 | 1,881,463 | 1,253,934 | 625,896 | 2    | 806,906   | 1,074,557 |
| YR227 | 1,666,384 | 1,112,587 | 552,413 | 2.01 | 669,714   | 996,670   |
| YR229 | 1,796,434 | 1,198,793 | 596,098 | 2.01 | 746,212   | 1,050,222 |



|       |           |           |         |      |           |           |
|-------|-----------|-----------|---------|------|-----------|-----------|
| YR230 | 1,717,061 | 1,144,055 | 571,612 | 2    | 625,849   | 1,091,212 |
| YR235 | 1,895,288 | 1,267,133 | 626,499 | 2.02 | 860,066   | 1,035,222 |
| YR237 | 1,842,268 | 1,229,021 | 611,598 | 2.01 | 824,345   | 1,017,923 |
| YR238 | 2,076,813 | 1,394,227 | 680,575 | 2.05 | 1,083,627 | 993,186   |
| YR242 | 1,762,601 | 1,175,700 | 585,496 | 2.01 | 657,191   | 1,105,410 |
| YR245 | 1,737,646 | 1,158,828 | 577,475 | 2.01 | 667,453   | 1,070,193 |
| YR66  | 1,655,168 | 1,106,742 | 547,004 | 2.02 | 720,293   | 934,875   |
| YR75  | 1,875,271 | 1,255,122 | 618,540 | 2.03 | 814,546   | 1,060,725 |
| YR76  | 1,848,754 | 1,236,283 | 610,828 | 2.02 | 842,349   | 1,006,405 |
| YR79  | 1,877,347 | 1,260,783 | 614,980 | 2.05 | 850,835   | 1,026,512 |

Notes:

Sample ID: Sample number.

YR: Yunling Goat.

NBY: Nubian Goat.

SNP Number: The number of single nucleotide polymorphisms, in this table, represents the number of SNPs between the sample genome and the reference genome.

Transition: Number of transition SNPs.

Transversion: Number of transversion SNPs.

Ti/Tv: Ratio of transition SNP and transversion SNP.

Heterozygosity Number: The total number of SNP loci of heterozygous typing.

Homozygosity Number: The total number of SNP loci of homozygous typing.

Table S4. Statistical table of InDel.

| Sample ID | Insertion Number | Deletion Number | Heterozygosity Number | Homozygosity Number |
|-----------|------------------|-----------------|-----------------------|---------------------|
| NBY01     | 145,140          | 132,745         | 129,479               | 148,406             |
| NBY05     | 139,944          | 128,553         | 123,438               | 145,059             |
| NBY07     | 139,275          | 127,590         | 124,338               | 142,527             |
| NBY08     | 145,828          | 134,835         | 131,000               | 149,663             |
| NBY10     | 143,157          | 131,756         | 129,122               | 145,791             |
| NBY100    | 151,266          | 140,089         | 143,312               | 148,043             |
| NBY101    | 141,041          | 129,156         | 126,919               | 143,278             |
| NBY103    | 151,208          | 139,807         | 139,688               | 151,327             |
| NBY105    | 156,713          | 145,404         | 144,760               | 157,357             |
| NBY107    | 152,810          | 139,471         | 139,940               | 152,341             |
| NBY109    | 154,765          | 142,059         | 139,683               | 157,141             |
| NBY11     | 148,192          | 135,904         | 117,748               | 166,348             |
| NBY110    | 149,830          | 137,985         | 136,175               | 151,640             |
| NBY112    | 153,425          | 141,042         | 137,437               | 157,030             |
| NBY114    | 161,799          | 147,524         | 143,499               | 165,824             |
| NBY115    | 142,228          | 130,397         | 118,641               | 153,984             |
| NBY117    | 151,737          | 138,931         | 137,667               | 153,001             |
| NBY118    | 151,638          | 139,481         | 136,882               | 154,237             |
| NBY120    | 136,436          | 125,229         | 121,410               | 140,255             |
| NBY122    | 162,971          | 149,337         | 144,113               | 168,195             |
| NBY124    | 156,244          | 144,043         | 144,710               | 155,577             |
| NBY125    | 160,724          | 148,159         | 148,028               | 160,855             |
| NBY13     | 160,197          | 147,894         | 148,017               | 160,074             |
| NBY14     | 140,380          | 129,223         | 126,274               | 143,329             |
| NBY16     | 143,966          | 132,187         | 130,985               | 145,168             |
| NBY17     | 145,030          | 133,159         | 130,427               | 147,762             |
| NBY19     | 144,260          | 132,839         | 130,163               | 146,936             |
| NBY20     | 140,015          | 128,685         | 127,128               | 141,572             |
| NBY22     | 146,242          | 133,623         | 127,612               | 152,253             |
| NBY23     | 145,103          | 133,281         | 129,567               | 148,817             |
| NBY27     | 132,276          | 122,236         | 113,162               | 141,350             |
| NBY29     | 139,281          | 128,071         | 126,082               | 141,270             |
| NBY32     | 150,657          | 138,400         | 135,171               | 153,886             |
| NBY35     | 144,608          | 134,029         | 129,782               | 148,855             |
| NBY36     | 139,394          | 128,846         | 126,158               | 142,082             |
| NBY38     | 142,224          | 130,912         | 127,605               | 145,531             |
| NBY40     | 150,251          | 138,138         | 135,186               | 153,203             |
| NBY42     | 151,486          | 138,431         | 134,544               | 155,373             |
| NBY44     | 145,551          | 133,110         | 129,647               | 149,014             |
| NBY48     | 147,891          | 136,385         | 132,481               | 151,795             |
| NBY52     | 134,275          | 122,177         | 115,433               | 141,019             |
| NBY53     | 140,212          | 128,235         | 124,130               | 144,317             |
| NBY55     | 144,503          | 133,442         | 127,931               | 150,014             |
| NBY56     | 129,775          | 119,014         | 114,011               | 134,778             |
| NBY58     | 133,430          | 122,586         | 114,568               | 141,448             |
| NBY59     | 153,694          | 140,717         | 140,527               | 153,884             |
| NBY61     | 146,799          | 134,049         | 127,570               | 153,278             |
| NBY63     | 141,268          | 129,612         | 125,016               | 145,864             |
| NBY69     | 124,261          | 113,089         | 105,647               | 131,703             |
| NBY71     | 142,552          | 130,104         | 124,327               | 148,329             |
| NBY73     | 153,276          | 141,584         | 139,221               | 155,639             |
| NBY83     | 143,865          | 131,854         | 128,630               | 147,089             |
| NBY85     | 130,913          | 120,023         | 114,405               | 136,531             |
| NBY87     | 142,667          | 130,647         | 127,115               | 146,199             |

---

|       |         |         |         |         |
|-------|---------|---------|---------|---------|
| NBY88 | 149,602 | 138,122 | 135,305 | 152,419 |
| NBY90 | 154,461 | 143,332 | 141,745 | 156,048 |
| NBY92 | 163,781 | 151,132 | 152,616 | 162,297 |
| NBY94 | 155,086 | 143,451 | 145,303 | 153,234 |
| NBY95 | 151,561 | 140,300 | 139,430 | 152,431 |
| NBY97 | 145,867 | 134,526 | 133,686 | 146,707 |
| YR123 | 143,416 | 131,342 | 121,410 | 153,348 |
| YR131 | 138,671 | 125,090 | 113,358 | 150,403 |
| YR132 | 140,410 | 127,495 | 111,734 | 156,171 |
| YR135 | 142,575 | 129,364 | 111,465 | 160,474 |
| YR140 | 161,474 | 148,004 | 140,200 | 169,278 |
| YR142 | 152,161 | 139,995 | 130,074 | 162,082 |
| YR143 | 140,704 | 126,563 | 105,650 | 161,617 |
| YR147 | 141,265 | 127,769 | 109,454 | 159,580 |
| YR148 | 144,914 | 131,985 | 115,623 | 161,276 |
| YR152 | 175,956 | 161,768 | 149,714 | 188,010 |
| YR155 | 158,361 | 144,090 | 131,282 | 171,169 |
| YR157 | 171,626 | 160,154 | 161,591 | 170,189 |
| YR158 | 159,799 | 146,017 | 139,103 | 166,713 |
| YR164 | 142,751 | 129,478 | 107,556 | 164,673 |
| YR166 | 166,129 | 153,190 | 149,850 | 169,469 |
| YR168 | 159,161 | 146,554 | 130,245 | 175,470 |
| YR172 | 169,871 | 155,911 | 144,467 | 181,315 |
| YR173 | 147,517 | 133,766 | 117,026 | 164,257 |
| YR174 | 157,832 | 144,340 | 130,180 | 171,992 |
| YR178 | 166,939 | 154,367 | 148,571 | 172,735 |
| YR180 | 155,381 | 143,081 | 131,322 | 167,140 |
| YR181 | 158,639 | 145,749 | 137,819 | 166,569 |
| YR183 | 150,106 | 137,578 | 123,954 | 163,730 |
| YR184 | 149,497 | 136,950 | 125,028 | 161,419 |
| YR186 | 168,522 | 152,527 | 124,992 | 196,057 |
| YR187 | 155,714 | 142,180 | 130,335 | 167,559 |
| YR189 | 151,934 | 138,383 | 119,756 | 170,561 |
| YR192 | 151,038 | 137,747 | 122,665 | 166,120 |
| YR193 | 158,604 | 144,585 | 128,662 | 174,527 |
| YR195 | 151,627 | 138,105 | 125,043 | 164,689 |
| YR196 | 155,450 | 141,551 | 130,566 | 166,435 |
| YR198 | 150,792 | 138,571 | 130,417 | 158,946 |
| YR199 | 146,815 | 133,170 | 117,349 | 162,636 |
| YR201 | 150,622 | 136,502 | 116,491 | 170,633 |
| YR203 | 155,029 | 141,461 | 127,327 | 169,163 |
| YR204 | 156,747 | 143,666 | 141,196 | 159,217 |
| YR205 | 145,852 | 133,700 | 119,357 | 160,195 |
| YR208 | 142,550 | 131,720 | 124,646 | 149,624 |
| YR209 | 144,072 | 131,071 | 116,753 | 158,390 |
| YR211 | 144,835 | 132,723 | 124,218 | 153,340 |
| YR212 | 143,949 | 131,428 | 120,633 | 154,744 |
| YR214 | 152,994 | 140,617 | 130,666 | 162,945 |
| YR215 | 149,193 | 136,688 | 125,788 | 160,093 |
| YR217 | 147,313 | 133,921 | 121,550 | 159,684 |
| YR218 | 154,011 | 141,981 | 135,559 | 160,433 |
| YR223 | 195,895 | 179,139 | 174,677 | 200,357 |
| YR224 | 152,008 | 137,591 | 123,864 | 165,735 |
| YR226 | 152,143 | 139,821 | 127,125 | 164,839 |
| YR227 | 134,677 | 122,259 | 108,520 | 148,416 |
| YR229 | 146,222 | 133,842 | 120,757 | 159,307 |
| YR230 | 141,291 | 127,437 | 108,156 | 160,572 |

---

|       |         |         |         |         |
|-------|---------|---------|---------|---------|
| YR235 | 152,429 | 139,267 | 133,669 | 158,027 |
| YR237 | 147,685 | 134,721 | 127,705 | 154,701 |
| YR238 | 155,805 | 143,057 | 142,349 | 156,513 |
| YR242 | 146,117 | 132,394 | 114,490 | 164,021 |
| YR245 | 141,926 | 128,919 | 112,454 | 158,391 |
| YR66  | 130,950 | 119,801 | 110,776 | 139,975 |
| YR75  | 151,142 | 137,988 | 129,811 | 159,319 |
| YR76  | 146,914 | 134,315 | 128,625 | 152,604 |
| YR79  | 152,186 | 138,452 | 133,276 | 157,362 |

Notes:

Sample ID: Sample number.

YR: Yunling Goat.

NBY: Nubian Goat.

SNP Number: The number of single nucleotide polymorphisms, in this table, represents the number of SNPs between the sample genome and the reference genome.

Transition: Number of transition SNPs.

Transversion: Number of transversion SNPs.

Ti/Tv: Ratio of transition SNP and transversion SNP.

Heterozygosity Number: The total number of SNP loci in heterozygous typing.

Homozygosity Number: Total number of SNP loci in homozygous typing.

Insertion Number: The number of insertion sites.

Deletion Number: The number of deletion sites.

Heterozygosity Number: The number of InDel loci of heterozygous type.

Homozygosity Number: The number of InDel loci of homozygous type.
